# Supplementary material
Source: PubMed Central journal article supplement (PMC2518898)
Supplement: blood-2007-12-126946_1.pdf [file blood-2007-12-126946_1.pdf]

| Pt no. | Age (yrs) | Sex | Rai stage | WBC *10 <sup>3</sup> /μl | Absolute lymphocyte | No of prior therapy (Refractory) | ZAP-70 status | IgVH status | B <sub>2</sub> M | ATM | p53 | Trisomy | % Apoptosis |        |
|--------|-----------|-----|-----------|--------------------------|---------------------|----------------------------------|---------------|-------------|------------------|-----|-----|---------|-------------|--------|
|        |           |     |           |                          |                     |                                  |               |             |                  |     |     |         | Pre         | Post * |
| 1      | 74        | F   | 3         | 38.2                     | 30560               | 0                                | +             | ND          | 5.8              | ND  | 0   | 47      | 12          | 94     |
| 2      | 54        | M   | 0         | 69.1                     | 62881               | 0                                | +             | 99.3        | 2                | ND  | ND  | 64      | 81          | 98     |
| 3      | 61        | M   | 4         | 458                      | 444260              | 1 (ref)                          | +             | 97.9        | 10.6             | ND  | 0   | 0       | 14          | 50     |
| 4      | 87        | F   | 1         | 92.5                     | 80470               | 0                                | -             | 88.8        | 3.3              | ND  | 0   | 69      | 15          | 62     |
| 5      | 59        | M   | 1         | 60.9                     | 56030               | 1                                | ND            | ND          | 2.8              | ND  | ND  | ND      | 7           | 88     |
| 6      | 54        | F   | 0         | 29.4                     | 22932               | 0                                | +             | ND          | 1.9              | ND  | ND  | ND      | 20          | 62     |
| 7      | 61        | M   | 4         | 458                      | 444260              | 1 (ref)                          | +             | 97.9        | 10.6             | ND  | 0   | 0       | 40          | 92     |
| 8      | 54        | M   | ND        | 100.9                    | 91819               | 3                                | ND            | ND          | ND               | ND  | 36  | 0       | 49          | 92     |
| 9      | 56        | M   | 2         | 47.1                     | 44270               | 0                                | -             | 96.3        | 3                | ND  | 0   | 0       | 33          | 78     |
| 10     | 59        | F   | 3         | 92.5                     | 80475               | 0                                | +             | 99.6        | 5.3              | ND  | 16  | 71      | 37          | 57     |
| 11     | 53        | F   | 4         | 44.1                     | 41895               | 0                                | -             | ND          | 3.1              | ND  | 0   | 0       | 33          | 82     |
| 12     | 52        | F   | 1         | 28.4                     | 24710               | 2                                | +             | 100         | 1.8              | 45  | 0   | 0       | 40          | 80     |
| 13     | 70        | M   | 4         | 98                       | 95060               | 2 (ref)                          | ND            | ND          | 2.5              | 94  | 0   | 0       | 17          | 79     |
| 14     | 60        | M   | 4         | 26.5                     | 21730               | 2                                | +             | 100         | 4.9              | ND  | 0   | 0       | 17          | 97     |
| 15     | 63        | M   | 1         | 20.6                     | 17098               | 0                                | -             | ND          | 2.1              | ND  | 0   | 42      | 23          | 99     |
| 16     | 53        | M   | 2         | 88.5                     | 76995               | 0                                | +             | 99.3        | 2.3              | ND  | 0   | 0       | 25          | 82     |
| 17     | 54        | M   | 0         | 11.2                     | 8064                | 0                                | -             | ND          | 1.7              | ND  | 0   | 0       | 77          | 96     |
| 18     | 48        | F   | 0         | 37                       | 31820               | 0                                | -             | ND          | 1.4              | ND  | 0   | 0       | 56          | 91     |
| 19     | 59        | F   | 0         | 29.5                     | 22420               | 0                                | +             | 99.3        | 2.1              | 11  | 63  | 0       | 44          | 95     |
| 20     | 59        | M   | 0         | 28.6                     | 23738               | 0                                | -             | ND          | 1.5              | 44  | 0   | 0       | 36          | 98     |
| 21     | 60        | F   | 1         | 35.8                     | 21838               | 0                                | +             | 99.3        | 3.6              | ND  | 0   | 69      | 60          | 95     |
| 22     | 52        | F   | 1         | 85.4                     | 80276               | 0                                | -             | 88.7        | 2.2              | ND  | 0   | 0       | 18          | 98     |
| 23     | 53        | F   | 1         | 120.6                    | ND                  | 0                                | -             | 91.5        | 2                | ND  | 0   | 0       | 15          | 88     |
| 24     | 59        | M   | 1         | 60.9                     | 56030               | 1                                | ND            | ND          | 2.8              | ND  | ND  | ND      | 7           | 79     |
| 25     | 83        | F   | 4         | 222.3                    | 208962              | 0                                | ND            | 92.2        | 4.9              | ND  | 0   | 0       | 15          | 95     |
| 26     | 78        | M   | 0         | 187.7                    | 163290              | 2                                | +             | 100         | 4.6              | ND  | 29  | 0       | 19          | 88     |
| 27     | 55        | M   | 0         | 28.5                     | 22515               | 1                                | -             | ND          | ND               | ND  | 0   | 0       | 25          | 92     |
| 28     | 83        | F   | 2         | 146.9                    | 143960              | 0                                | ND            | 92.2        | 4.9              | ND  | 0   | 0       | 14          | 97     |
| 29     | 63        | M   | 2         | 100.3                    | 91273               | 2                                | +             | 97.3        | 3.9              | ND  | 0   | 0       | 40          | 92     |
| 30     | 56        | M   | 0         | 11.3                     | 9266                | 0                                | ND            | ND          | 1.9              | ND  | 0   | 0       | 49          | 93     |
| 31     | 71        | F   | 4         | 109.1                    | 93826               | 3 (ref)                          | ND            | ND          | 11               | ND  | 70  | 78      | 35          | 78     |

| Pt no. | Age (yrs) | Sex | Rai stage | WBC *10 <sup>3</sup> /μl | Absolute lymphocyte | No of prior therapy (Refractory) | ZAP-70 status | IgVH status | B <sub>2</sub> M | ATM | p53 | Trisomy | % Apoptosis |        |
|--------|-----------|-----|-----------|--------------------------|---------------------|----------------------------------|---------------|-------------|------------------|-----|-----|---------|-------------|--------|
|        |           |     |           |                          |                     |                                  |               |             |                  |     |     |         | Pre         | Post * |
| 32     | 58        | F   | 2         | 46.8                     | 39780               | 0                                | ND            | ND          | 3.5              | ND  | 0   | 62      | 37          | 70     |
| 33     | 74        | M   | 2         | 77.5                     | 71300               | 0                                | ND            | ND          | 4.4              | ND  | 0   | 0       | 34          | 75     |
| 34     | 64        | F   | 0         | 15.7                     | 13502               | 0                                | ND            | ND          | 1.4              | ND  | 0   | 0       | 20          | 63     |
| 35     | 66        | M   | 1         | 26.3                     | 20251               | 0                                | ND            | ND          | 2.1              | ND  | 0   | 0       | 40          | 80     |
| 36     | 75        | M   | 2         | 55.9                     | 5031                | 1                                | +             | 100         | ND               | ND  | 0   | 70      | 59          | 88     |
| 37     | 60        | M   | ND        | 23.6                     | 2006                | 0                                | ND            | ND          | ND               | ND  | 0   | 0       | 22          | 71     |
| 38     | 82        | M   | 4         | 23.6                     | 2336                | 1                                | ND            | ND          | 4.9              | ND  | 37  | 0       | 8           | 84     |
| 39     | 78        | M   | 4         | 38.7                     | 3639                | 1                                | ND            | ND          | ND               | ND  | 0   | 0       | 18          | 55     |
| 40     | 53        | M   | 1         | 31.7                     | 2821                | 1                                | -             | ND          | 2.5              | 23  | 0   | 0       | ND          | ND     |
| 41     | 77        | F   | ND        | 21.2                     | 1823                | 0                                | +             | 99.6        | ND               | ND  | 0   | 73      | 46          | 80     |
| 42     | 69        | F   | 1         | 18.1                     | 1532                | 0                                | ND            | ND          | ND               | ND  | ND  | ND      | 10          | 62     |
| 43     | 54        | F   | 1         | 104.5                    | 9301                | 0                                | ND            | ND          | 6.2              | ND  | 12  | 68      | ND          | ND     |
| 44     | 60        | M   | 1         | 62.9                     | 5661                | 0                                | ND            | ND          | ND               | 10  | 80  | 6       | ND          | ND     |
| 45     | 72        | F   | 1         | 59.2                     | 5032                | 0                                | +             | ND          | 2                | ND  | 0   | 0       | 55          | 77     |
| 46     | 56        | M   |           | 44.3                     | 3278                | 3                                | +             | ND          | ND               | ND  | 73  | 62      | 54          | 70     |
| 47     | 54        | F   | 0         | 29.4                     | 22932               | 0                                | +             | ND          | 1.9              | 23  | ND  | ND      | 20          | 62     |
| 48     | 58        | F   | 0         | 14.5                     | 638                 | 0                                | ND            | ND          | 2                | ND  | ND  | ND      | 20          | 48     |
| 49     | 50        | M   | ND        | 95.3                     | 9244                | 0                                | -             | ND          | ND               | ND  | ND  | ND      | 22          | 45     |
| 50     | 62        | M   | 2         | ND                       | ND                  | 3 (ref)                          | ND            | ND          | 2.9              | 95  | ND  | ND      | 8           | 78     |

WBC - White blood cells, B2M- Beta 2 microglobulin, Rai-Disease stage, IgVH-Immunoglobulin variable heavy chain, ND-Not done

\* 30 μM Gossypol - 24 hr
