# Supplementary material
Source: PubMed Central journal article supplement (PMC2518898)
Supplement: blood-2007-12-126946_2.pdf [file blood-2007-12-126946_2.pdf]

| Patient # | Treatment      | % Apoptosis |     |      |
|-----------|----------------|-------------|-----|------|
|           |                | 4 h         | 8 h | 24 h |
| 1         | Control        | 15          | 19  | 49   |
|           | Z-VAD          | 7           | 21  | 23   |
|           | Z-VAD+gossypol | 16          | 52  | 77   |
|           | Gossypol       | 26          | 57  | 93   |
| 2         | Control        | 7           | 8   | 34   |
|           | Z-VAD          | 7           | 9   | 21   |
|           | Z-VAD+gossypol | 22          | 28  | 82   |
|           | Gossypol       | 13          | 20  | 75   |
| 3         | Control        | 25          | 28  | 22   |
|           | Z-VAD          | 19          | 40  | 26   |
|           | Z-VAD+gossypol | 25          | 35  | 25   |
|           | Gossypol       | 29          | 30  | 45   |
